# Supplementary material for: Exploring necrotizing autoimmune myopathies with a novel immunoassay for anti-3-hydroxy-3-methyl-glutaryl-CoA reductase autoantibodies
Source: PubMed Central journal article supplement (PMC3979083; doi:10.1186/ar4468), 2014-02-03
Supplement: ar4468-S2.pdf [file ar4468-S2.pdf]

## Additional file 2

### Reproducibility of ALBIA-HMGCR

| Serum number | Anti-HMGCR level (AU/mL) | Intra-assay variation (within plate) %CV (n) | Inter-assay variation (assay to assay) %CV (n) | Inter-assay variation (batch to batch) %CV (n) |
|--------------|--------------------------|----------------------------------------------|------------------------------------------------|------------------------------------------------|
| # 1          | 455 (high)               | 5 (25)                                       | 9 (30)                                         | 2.8 (2)                                        |
| # 2          | 223 (medium)             | 5 (25)                                       | 11 (30)                                        | 4.5 (2)                                        |
| # 3          | 29 (low)                 | 13 (25)                                      | 10 (30)                                        | 5.7 (2)                                        |
