# Supplementary material for: Exploring necrotizing autoimmune myopathies with a novel immunoassay for anti-3-hydroxy-3-methyl-glutaryl-CoA reductase autoantibodies
Source: PubMed Central journal article supplement (PMC3979083; doi:10.1186/ar4468), 2014-02-03
Supplement: ar4468-S3.pdf [file ar4468-S3.pdf]

**A**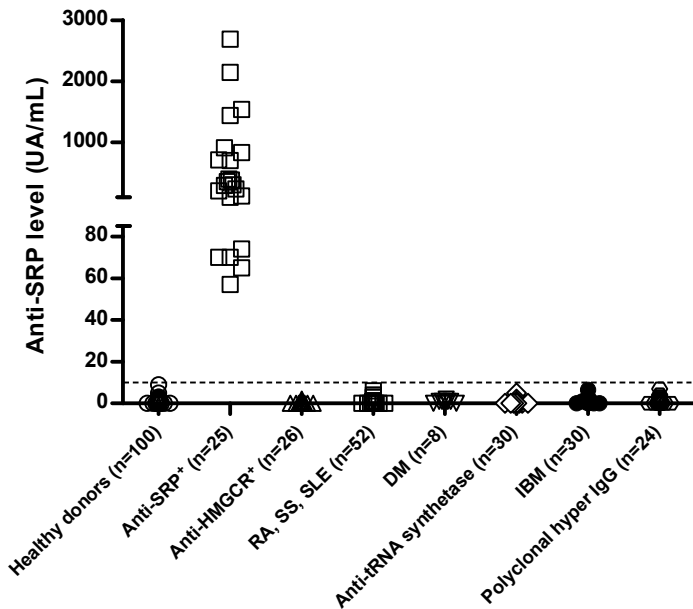**B**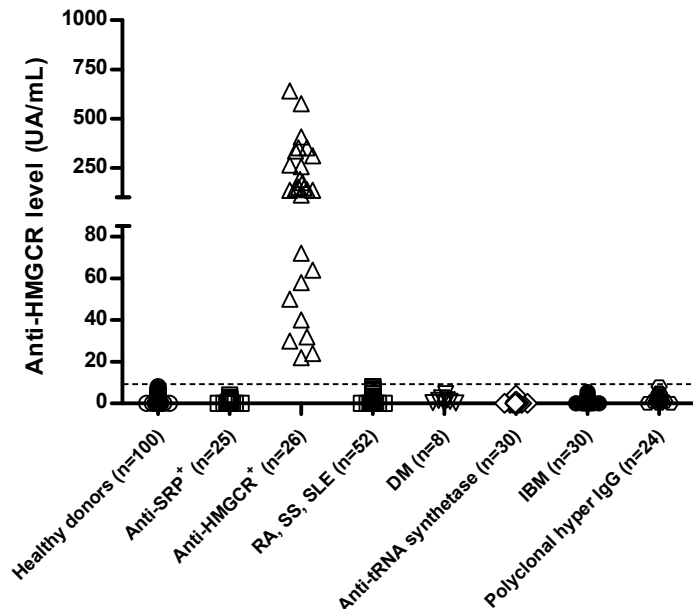

**Additional file 3 Validation of ALBIA-NAM.** A positivity cutoff of the multiplex assay (dotted line) was determined as the 99th percentile of the healthy donors distribution (open circles) for both (A) anti-SRP (9 AU/mL) and (B) anti-HMGCRA aAbs (8 AU/mL). Sera from patients with different inflammatory/autoimmune conditions including rheumatoid arthritis (RA), systemic sclerosis (SS), systemic lupus erythematosus (SLE), dermatomyositis (DM), anti-tRNA synthetase aAb positive myositis or inclusion body myositis (IBM), as well as patients with polyclonal hyper-gammaglobulinemia were assayed.
